# Supplementary material
Source: PubMed Central journal article supplement (PMC2887540)
Supplement: supp_59_6_1497__1.pdf [file supp_59_6_1497__1.pdf]

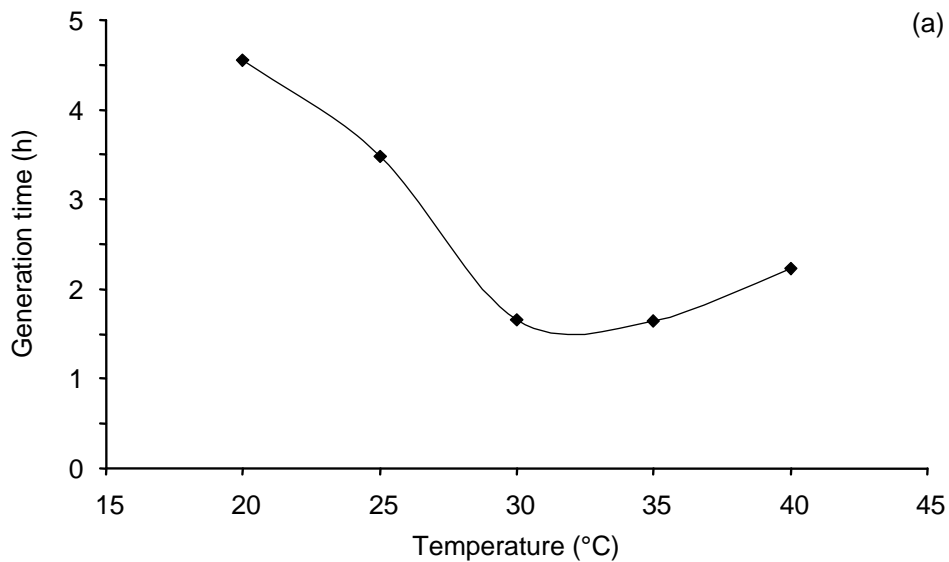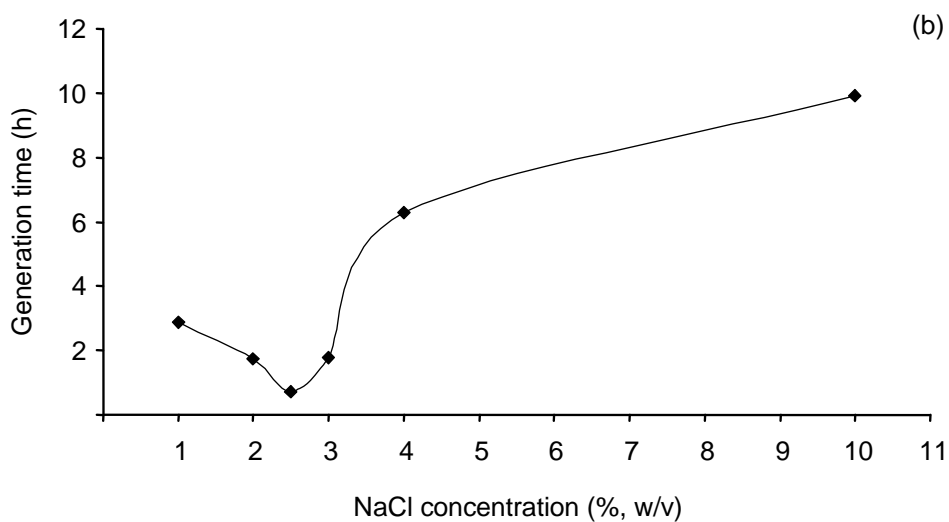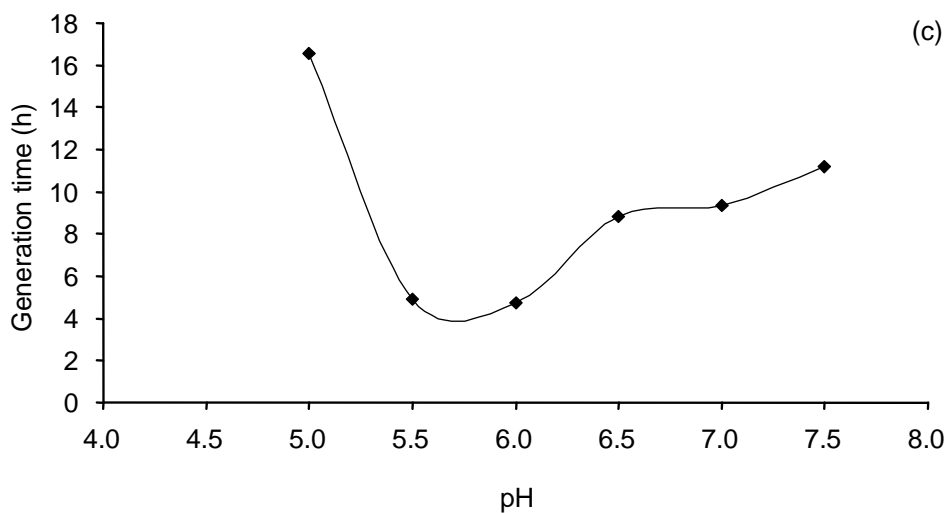

**Supplementary Fig. S1.** Generation time of *Salinisphaera hydrothermalis* sp. nov. EPR70<sup>T</sup> under different growth conditions.

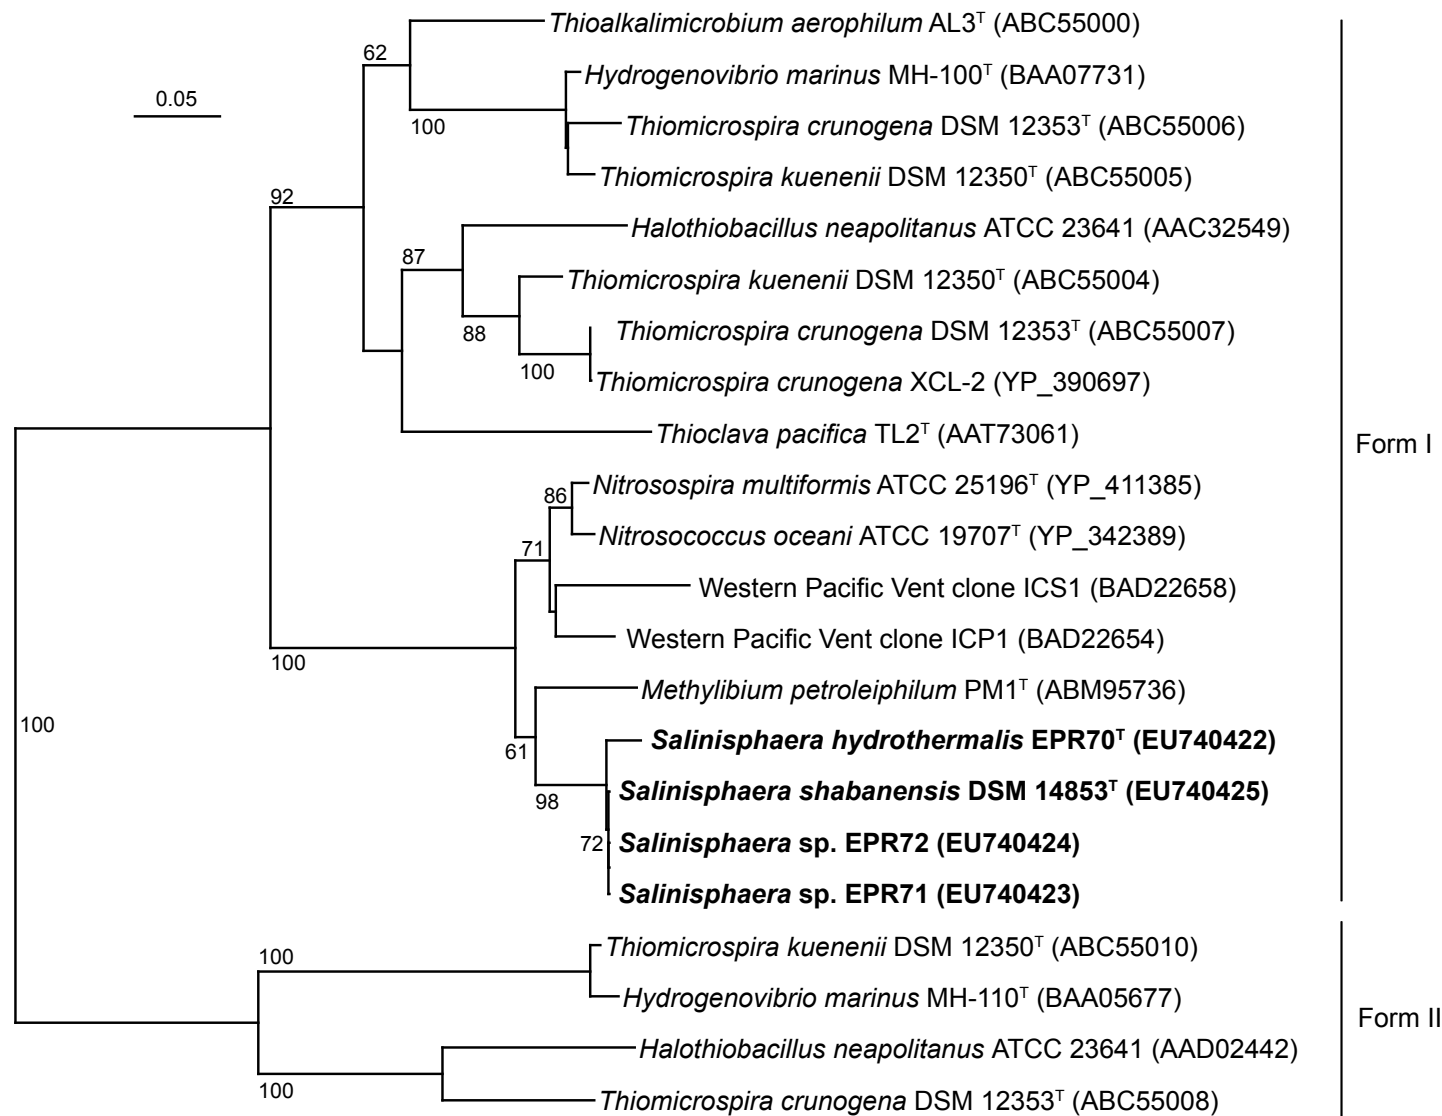

**Supplementary Fig. S2.** Phylogenetic analysis of the large subunit of the enzyme RubisCO form I from *Salinisphaera hydrothermalis* sp. nov. EPR70<sup>T</sup>, *Salinisphaera* sp. strains EPR71 and EPR72 and *S. shabanensis* DSM 14853<sup>T</sup>. The neighbour-joining tree was constructed using PHYLO\_WIN. Bootstrap values higher than 50 % are indicated. Bar, 5 % estimated substitutions.

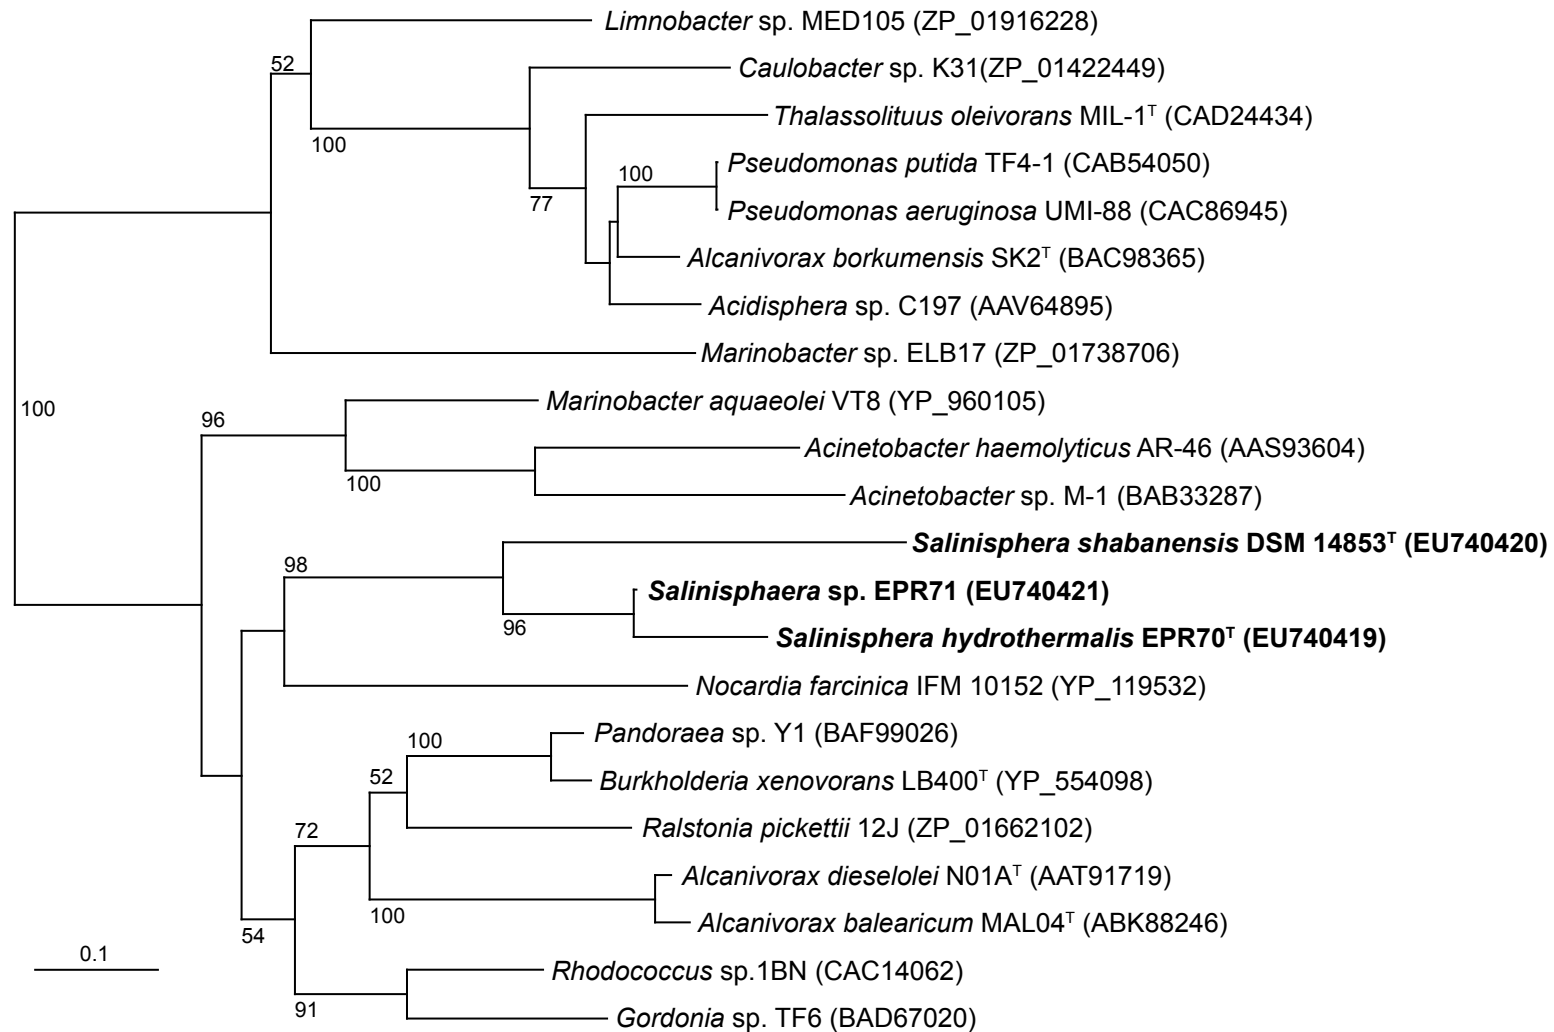

**Supplementary Fig. S3.** Phylogenetic analysis of alkane hydroxylase (AlkB) from *Salinisphaera hydrothermalis* sp. nov. EPR70<sup>T</sup>, *Salinisphaera* sp. strain EPR71 and *S. shabanensis* DSM 14853. The neighbour-joining tree was constructed using PHYLO\_WIN. Bootstrap values higher than 50% are indicated. Bar, 10% estimated substitutions.
